# Supplementary material
Source: PubMed Central journal article supplement (PMC5934973)
Supplement: Supp_Fig1.pdf [file Supp_Fig1.pdf]

## Supplementary Data

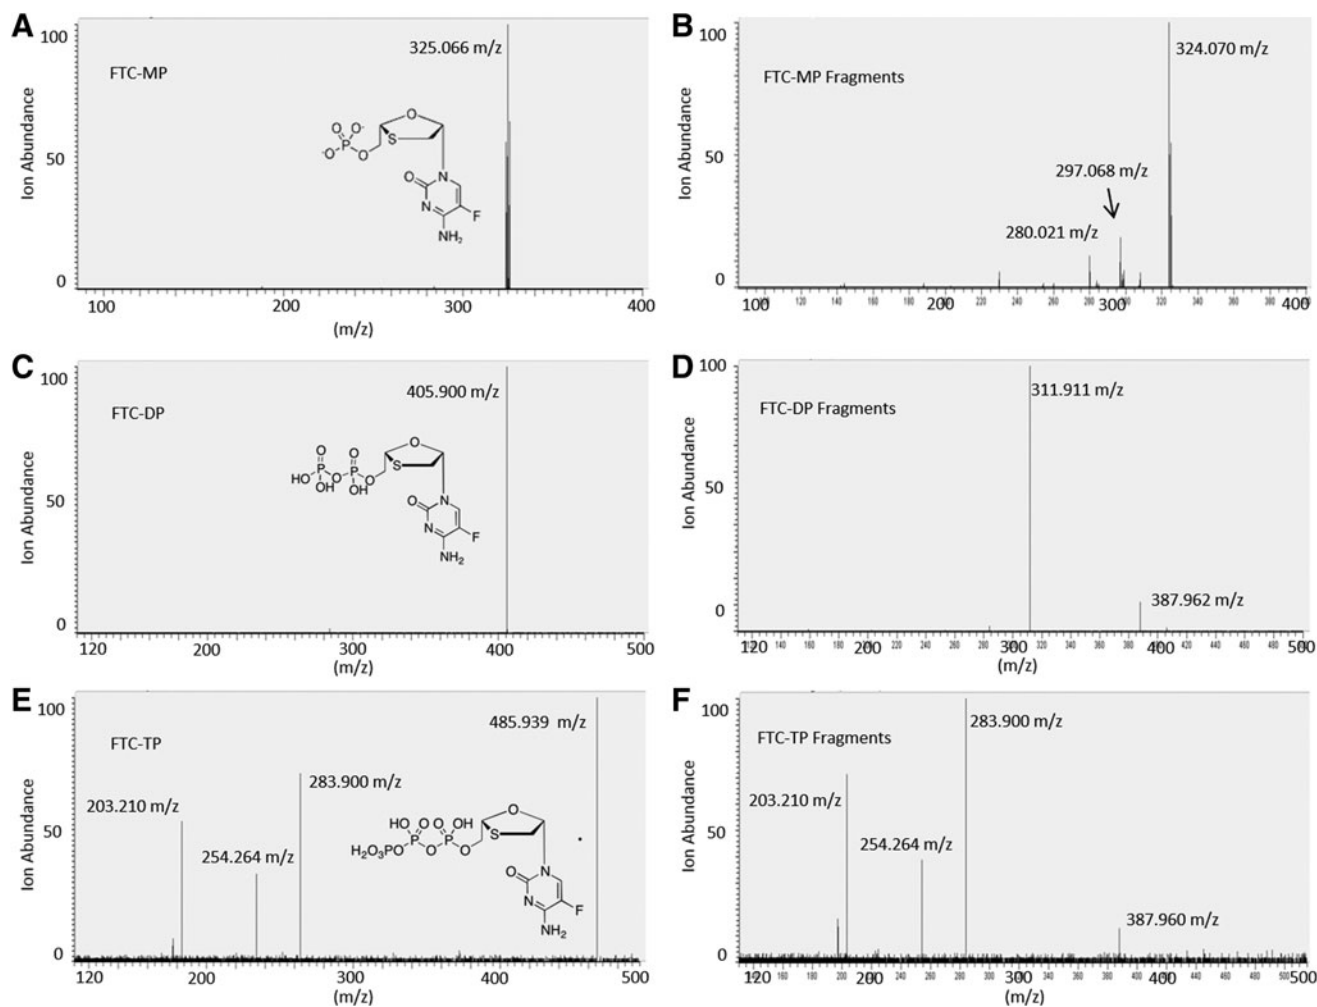

**SUPPLEMENTARY FIG. S1.** Parent and fragment ions of FTC phosphorylated metabolites generated from human PBMC incubation with FTC were detected in cellular homogenates using negative ion mode MALDI-Orbitrap-MS. FTC-MP (**A**) was detected utilizing CHCA matrix at 325.066 m/z, with a fragment ion of 259.068 m/z (**B**) following CID with 55 eV. FTC-DP (**C**) was detected in 9AA matrix at 405.900 m/z, with a fragment ion of 311.911 m/z (**D**) following CID with 30 eV. FTC-TP (**E**) was detected in 9AA matrix at 485.939 m/z, with a fragment ion of 387.960 m/z (**F**) following CID with 35 eV. FTC, fumarate and emtricitabine; PBMC, peripheral blood mononuclear cell.
